# Supplementary material for: Neem plant extract-assisted synthesis of CeO2nanoparticles for photocatalytic degradation of piroxicam and naproxen
Source: Royal Society of Chemistry journal article supplement (doi:10.1039/d3ra04185a), 2023-01-01
Supplement: d3ra04185a1.pdf [file d3ra04185a1.pdf]

**Supplementary data**

**Neem plant extract-assisted synthesis of CeO<sub>2</sub> nanoparticles for photocatalytic degradation  
of piroxicam and naproxen**

Farah Quddus<sup>1</sup>, Afzal Shah<sup>1\*</sup>, Jan Nisar<sup>2</sup>, Muhammad Abid Zia<sup>3</sup>, Shamsa Munir<sup>4\*</sup>

<sup>1</sup>*Department of Chemistry, Quaid-i-Azam University, Islamabad 45320, Pakistan*

<sup>1</sup>*National Centre of Excellence in Physical Chemistry, University of Peshawar, Peshawar 25120,  
Pakistan*

<sup>3</sup>*University of Education Attock, Attock, Punjab 43600, Pakistan*

<sup>4</sup>*School of Applied Sciences and Humanities, National University of Technology, Islamabad  
44000, Pakistan*

\*Corresponding author: Afzal Shah [afzals\\_qau@yahoo.com](mailto:afzals_qau@yahoo.com)

Co-corresponding author: Shamsa Munir, [smunir@nutech.edu.pk](mailto:smunir@nutech.edu.pk)

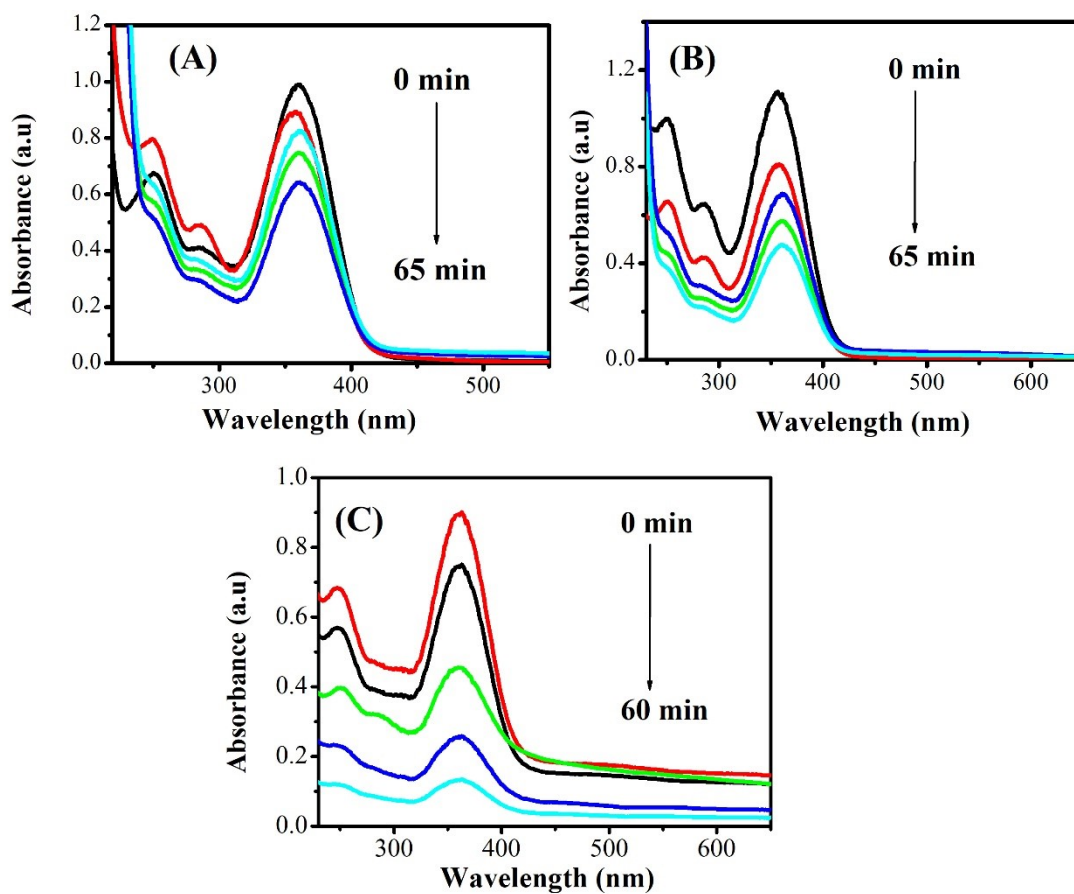

**Figure S1.** Effect of various scavengers (A) tert- butanol (B) ammonium oxalate (c) AgNO<sub>3</sub> on degradation efficiency of piroxicam.

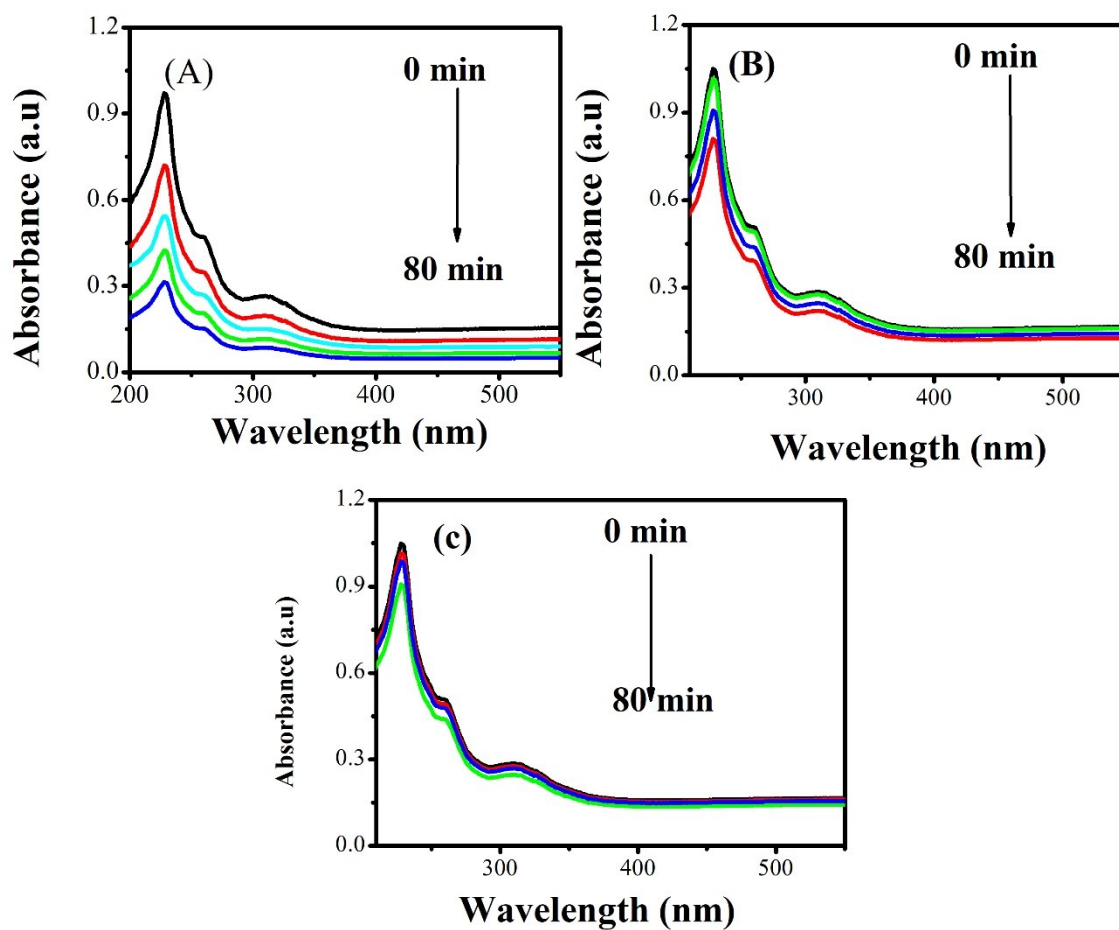

**Figure S2.** Effect of various Scavengers (A) silver nitrate (B) ammonium oxalate (c) tert-butanol on degradation efficiency of naproxen.

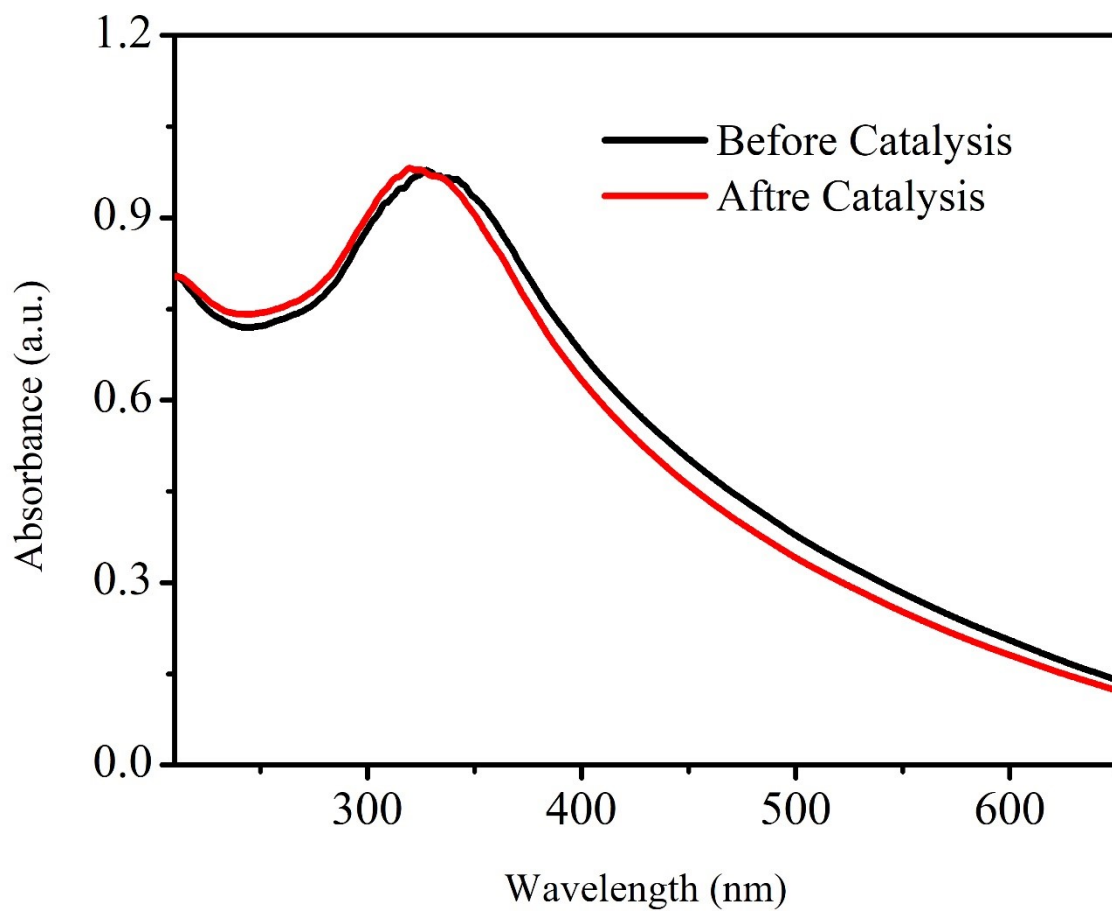

**Figure S3.** The absorption spectra of CeO<sub>2</sub> NPs before and after catalysis of 6<sup>th</sup> cycle.

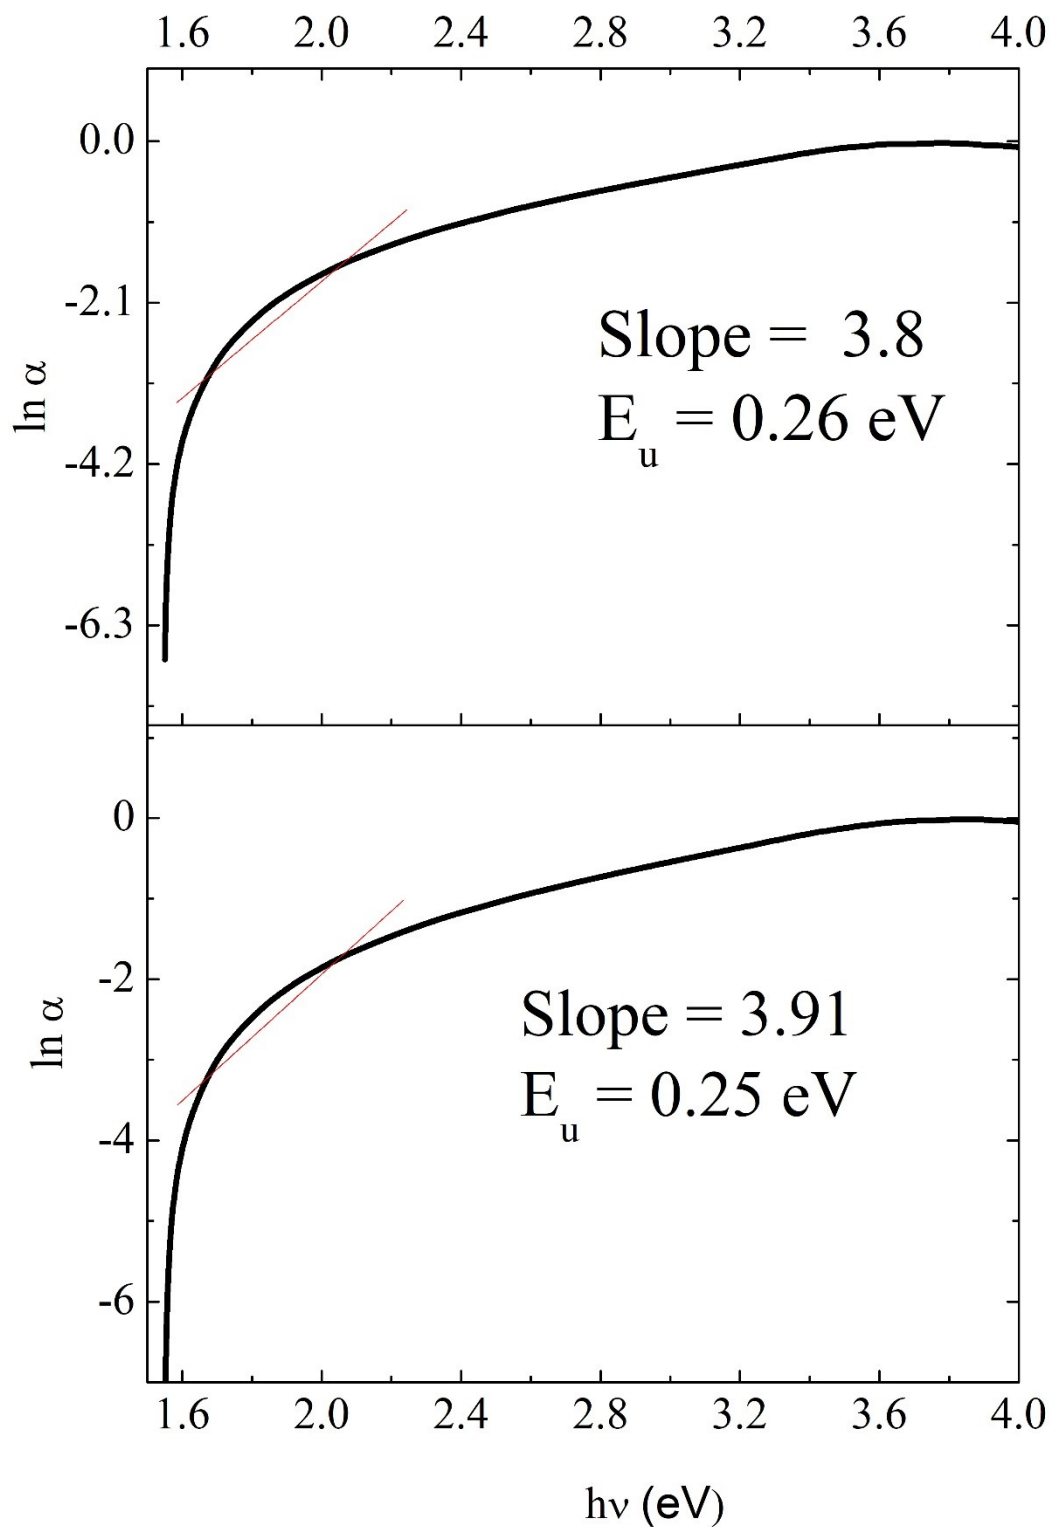

**Figure S4:** The Urbach energy calculation CeO<sub>2</sub> NPs before and after catalysis of 6<sup>th</sup> cycle.
